# Supplementary material for: Rapid Discovery of Substances with Anticancer Potential from Marine Fungi Based on a One Strain–Many Compounds Strategy and UPLC-QTOF-MS
Source: MDPI journal article supplement (doi:10.3390/md21120646), 2023-12-18
Supplement: s1 [file s1]

**Table S1.** Sequence alignment results of twenty-eight strains. Closest relative identification showing high sequence similarity according to NCBI GenBank by BLAST are displayed.

**Table S2.** Mass spectral information of differential compounds in secondary metabolites of marine fungi analysed based on UPLC-QTOF-MS technique.

**Figure S1.** Possible fragmentation pathway of the structure of **compounds 1-8**.

**Figure S2.** Possible fragmentation pathway of the structure of **compounds 9-16**.

**Figure S3.** Possible fragmentation pathway of the structure of **compounds 17-23**.

**Table S1.** Sequence alignment results of twenty-eight strains. Closest relative identification showing high sequence similarity according to NCBI GenBank by BLAST are displayed.

| Strain number | Sequence length | Accession number | Closest relative in NCBI GenBank                     | Sequence similarity % | Order                        |
|---------------|-----------------|------------------|------------------------------------------------------|-----------------------|------------------------------|
| P-WZ1         | 581             | OK315644         | <i>Curvularia</i> sp. 3 YHY-2018                     | 100                   | <i>Curvularia</i> sp.        |
| P-WZ2         | 562             | OK315664         | <i>Alternaria alternata</i> KU20017.1                | 100                   | <i>Alternaria</i> sp.        |
| P-WZ3-1       | 535             | OK316146         | <i>Fusarium oxysporum</i> N-61-2                     | 100                   | <i>Fusarium</i> sp.          |
| P-WZ3-2       | 564             | OK316148         | <i>Fusarium oxysporum</i> R97208                     | 100                   | <i>Fusarium</i> sp.          |
| P-WZ4         | 545             | OK316147         | <i>Neopestalotiopsis rosae</i> KoRLI046308           | 100                   | <i>Neopestalotiopsis</i> sp. |
| P-WZ5         | 598             | OK316891         | <i>Pestalotiopsis</i> sp. Y. H. Yeh I1005            | 100                   | <i>Pestalotiopsis</i> sp.    |
| P-WZ6         | 539             | OK316900         | <i>Fusarium oxysporum</i> N-19-2                     | 100                   | <i>Fusarium</i> sp.          |
| P-WZ10        | 537             | OK316920         | <i>Lasiodiplodia Pseudotheobromae</i><br>KoRLI047143 | 100                   | <i>Lasiodiplodia</i> sp.     |
| P-WZ11        | 613             | OK316970         | <i>Trichoderma harzianum</i> ASF-T10                 | 100                   | <i>Trichoderma</i> sp.       |
| P-WZ13        | 540             | OK317238         | <i>Fusarium oxysporum</i> SF-942                     | 100                   | <i>Fusarium</i> sp.          |
| P-WS18-1      | 583             | OK317395         | <i>Arthrinium intestini</i> CBS 135835               | 99.13                 | <i>Arthrinium</i> sp.        |
| P-WS18-2      | 586             | OK317689         | <i>Arthrinium</i> sp. GU071007                       | 99.13                 | <i>Arthrinium</i> sp.        |
| M-WS19        | 550             | OK317702         | <i>Aspergillus chevalieri</i> DTO 401-E8             | 100                   | <i>Aspergillus</i> sp.       |
| M-WS24        | 624             | OK318456         | <i>Rhodotorula mucilaginosa</i> CBS:316              | 100                   | <i>Rhodotorula</i> sp.       |
| M-WS25-1      | 602             | OK319053         | <i>Trichoderma sulphureum</i> SF-974                 | 100                   | <i>Trichoderma</i> sp.       |
| M-WS25-2      | 605             | OK323230         | <i>Trichoderma</i> sp. ZMQRS9                        | 100                   | <i>Trichoderma</i> sp.       |
| M-WS26        | 574             | OK321188         | <i>Penicillium senticosum</i> F1                     | 99.83                 | <i>Penicillium</i> sp.       |
| Y-WS27        | 605             | OK323141         | <i>Aspergillus terreus</i> SF-917                    | 100                   | <i>Aspergillus</i> sp.       |
| Y-WS28        | 548             | OK323136         | <i>Nigrospora sphaerica</i> 06                       | 100                   | <i>Nigrospora</i> sp.        |
| P4            | 545             | OK323137         | <i>Nigrospora aurantiaca</i> KoRLI047350             | 100                   | <i>Nigrospora</i> sp.        |
| P3            | 599             | OK323144         | <i>Pestalotiopsis</i> sp. SC5A8                      | 100                   | <i>Pestalotiopsis</i> sp.    |
| P56           | 613             | OK323139         | <i>Rhodotorula mucilaginosa</i> CD18Y                | 100                   | <i>Rhodotorula</i> sp.       |
| P341          | 602             | OK323146         | <i>Aspergillus terreus</i> CY229                     | 99.83                 | <i>Aspergillus</i> sp.       |
| P342          | 589             | OK323143         | <i>Curvularia clavata</i> M5                         | 100                   | <i>Curvularia</i> sp.        |
| P-L1          | 578             | OK323138         | <i>Talaromyces</i> sp. ERR11-7                       | 100                   | <i>Talaromyces</i> sp.       |
| P-L2          | 559             | OK323242         | <i>Fusarium</i> sp. YZ7-10                           | 99.09                 | <i>Fusarium</i> sp.          |
| M-L3          | 592             | OK323142         | <i>Diaporthe discoidispora</i> NKDL-2-3              | 99.65                 | <i>Diaporthe</i> sp.         |
| M-L4          | 572             | OK323145         | <i>Talaromyces oumae-annae</i> SF-976                | 100                   | <i>Talaromyces</i> sp.       |

**Table S2.** Mass spectral information of differential compounds in secondary metabolites of marine fungi analysed based on UPLC-QTOF-MS technique.

| Crude extract | NO. | Rt (min) | Mass (m/z) | ppm error | Molecular Formula                                             | Fragment Ions (MS <sub>2</sub> ) | MS <sub>2</sub> molecular formula                                          | Name of compound    | Activity      | Reference |
|---------------|-----|----------|------------|-----------|---------------------------------------------------------------|----------------------------------|----------------------------------------------------------------------------|---------------------|---------------|-----------|
| P-WZ-2-1      | 1   | 9.169    | 706.3923   | 0.013     | C <sub>37</sub> H <sub>51</sub> N <sub>7</sub> O <sub>7</sub> | 237.212                          | C <sub>14</sub> H <sub>23</sub> NO <sub>2</sub> <sup>+</sup>               | enamidonin          | antibacterial | [1]       |
|               |     |          |            |           |                                                               | 348.179                          | C <sub>19</sub> H <sub>30</sub> N <sub>3</sub> O <sub>3</sub> <sup>+</sup> |                     |               |           |
|               |     |          |            |           |                                                               | 371.181                          | C <sub>19</sub> H <sub>23</sub> N <sub>4</sub> O <sub>4</sub> <sup>+</sup> |                     |               |           |
|               | 2   | 14.061   | 462.2387   | 0.002     | C <sub>27</sub> H <sub>31</sub> N <sub>3</sub> O <sub>4</sub> | 252.029                          | C <sub>17</sub> H <sub>18</sub> NO <sup>+</sup>                            | notoamide F         | -             | [2,3]     |
|               |     |          |            |           |                                                               | 387.214                          | C <sub>25</sub> H <sub>27</sub> N <sub>2</sub> O <sub>2</sub> <sup>+</sup> |                     |               |           |
|               |     |          |            |           |                                                               | 444.240                          | C <sub>26</sub> H <sub>26</sub> N <sub>3</sub> O <sub>4</sub> <sup>+</sup> |                     |               |           |
|               | 3   | 18.047   | 507.3680   | 0.002     | C <sub>30</sub> H <sub>50</sub> O <sub>6</sub>                | 211.095                          | C <sub>13</sub> H <sub>23</sub> O <sub>2</sub> <sup>+</sup>                | penicisteroid G     | anticancer    | [4]       |
|               |     |          |            |           |                                                               | 279.232                          | C <sub>17</sub> H <sub>27</sub> O <sub>3</sub> <sup>+</sup>                |                     |               |           |
|               |     |          |            |           |                                                               | 319.224                          | C <sub>21</sub> H <sub>35</sub> O <sub>2</sub> <sup>+</sup>                |                     |               |           |
|               |     |          |            |           |                                                               | 321.241                          | C <sub>19</sub> H <sub>29</sub> O <sub>4</sub> <sup>+</sup>                |                     |               |           |
|               | 4   | 24.343   | 633.3997   | 0.068     | C <sub>36</sub> H <sub>56</sub> O <sub>9</sub>                | 135.115                          | C <sub>5</sub> H <sub>11</sub> O <sub>4</sub> <sup>+</sup>                 | oligoporin B        | anticancer    | [5]       |
|               |     |          |            |           |                                                               | 163.037                          | C <sub>6</sub> H <sub>11</sub> O <sub>5</sub> <sup>+</sup>                 |                     |               |           |
|               |     |          |            |           |                                                               | 493.402                          | C <sub>28</sub> H <sub>45</sub> O <sub>7</sub> <sup>+</sup>                |                     |               |           |
|               | 5   | 25.601   | 635.4001   | 0.017     | C <sub>32</sub> H <sub>58</sub> O <sub>12</sub>               | 151.035                          | C <sub>5</sub> H <sub>11</sub> O <sub>5</sub> <sup>+</sup>                 | β-D-Mannopyranoside | -             | [6]       |
|               |     |          |            |           |                                                               | 363.249                          | C <sub>16</sub> H <sub>27</sub> O <sub>9</sub> <sup>+</sup>                |                     |               |           |
|               |     |          |            |           |                                                               | 495.416                          | C <sub>28</sub> H <sub>47</sub> O <sub>7</sub> <sup>+</sup>                |                     |               |           |
|               |     |          |            |           |                                                               | 563.403                          | C <sub>27</sub> H <sub>47</sub> O <sub>12</sub> <sup>+</sup>               |                     |               |           |
| P-WZ-3-2-2    | 6   | 9.297    | 852.4893   | 0.022     | C <sub>48</sub> H <sub>69</sub> NO <sub>12</sub>              | 89.056                           | C <sub>4</sub> H <sub>9</sub> O <sub>2</sub> <sup>+</sup>                  | chivosazole B       | cytotoxic     | [7]       |
|               |     |          |            |           |                                                               | 176.097                          | C <sub>8</sub> H <sub>16</sub> O <sub>4</sub> <sup>+</sup>                 |                     |               |           |
|               |     |          |            |           |                                                               | 646.310                          | C <sub>39</sub> H <sub>52</sub> NO <sub>7</sub> <sup>+</sup>               |                     |               |           |
|               | 7   | 17.187   | 301.1434   | 0.002     | C <sub>18</sub> H <sub>20</sub> O <sub>4</sub>                | 121.101                          | C <sub>8</sub> H <sub>9</sub> O <sup>+</sup>                               | trichoderolide B    | cytotoxic     | [8]       |
|               |     |          |            |           |                                                               | 149.093                          | C <sub>9</sub> H <sub>9</sub> O <sub>2</sub> <sup>+</sup>                  |                     |               |           |
| P-WZ-4-4      | 8   | 19.704   | 427.2479   | 0.002     | C <sub>26</sub> H <sub>34</sub> O <sub>5</sub>                | 180.107                          | C <sub>10</sub> H <sub>12</sub> O <sub>3</sub> <sup>+</sup>                | cladobotric acid D  | cytotoxic     | [9]       |
|               |     |          |            |           |                                                               | 109.100                          | C <sub>7</sub> H <sub>9</sub> O <sup>+</sup>                               |                     |               |           |
|               |     |          |            |           |                                                               | 190.019                          | C <sub>12</sub> H <sub>14</sub> O <sub>2</sub> <sup>+</sup>                |                     |               |           |
|               |     |          |            |           |                                                               | 302.145                          | C <sub>19</sub> H <sub>26</sub> O <sub>3</sub> <sup>+</sup>                |                     |               |           |
|               | 9   | 13.358   | 274.2125   | 0.062     | C <sub>13</sub> H <sub>27</sub> N <sub>3</sub> O <sub>3</sub> | 318.140                          | C <sub>19</sub> H <sub>26</sub> O <sub>4</sub> <sup>+</sup>                | fragin              | anticancer    | [10-12]   |
|               |     |          |            |           |                                                               | 88.075                           | C <sub>2</sub> H <sub>6</sub> N <sub>3</sub> O <sup>+</sup>                |                     |               |           |
|               |     |          |            |           |                                                               | 102.091                          | C <sub>5</sub> H <sub>12</sub> NO <sup>+</sup>                             |                     |               |           |
|               | 10  | 13.514   | 318.3003   | 0.001     | C <sub>18</sub> H <sub>39</sub> NO <sub>3</sub>               | 106.086                          | C <sub>10</sub> H <sub>18</sub> N <sub>3</sub> O <sub>2</sub> <sup>+</sup> | phytosphingosine    | anticancer    | [13,14]   |
|               |     |          |            |           |                                                               | 102.090                          | C <sub>4</sub> H <sub>8</sub> NO <sub>2</sub> <sup>+</sup>                 |                     |               |           |
|               |     |          |            |           |                                                               | 132.101                          | C <sub>6</sub> H <sub>14</sub> NO <sub>2</sub> <sup>+</sup>                |                     |               |           |
|               |     |          |            |           |                                                               | 256.263                          | C <sub>15</sub> H <sub>28</sub> O <sub>3</sub> <sup>+</sup>                |                     |               |           |
|               | 11  | 15.243   | 453.1544   | 0.013     | C <sub>25</sub> H <sub>24</sub> O <sub>8</sub>                | 257.265                          | C <sub>14</sub> H <sub>27</sub> NO <sub>3</sub> <sup>+</sup>               | thielavin S         | antibacterial | [15]      |
|               |     |          |            |           |                                                               | 119.085                          | C <sub>8</sub> H <sub>7</sub> O <sup>+</sup>                               |                     |               |           |
|               |     |          |            |           |                                                               | 135.080                          | C <sub>8</sub> H <sub>7</sub> O <sub>2</sub> <sup>+</sup>                  |                     |               |           |
|               | 12  | 18.53    | 312.2169   | 0.146     | C <sub>17</sub> H <sub>29</sub> NO <sub>4</sub>               | 147.065                          | C <sub>9</sub> H <sub>7</sub> O <sub>2</sub> <sup>+</sup>                  | penicillenol D      | antibacterial | [16]      |
|               |     |          |            |           |                                                               | 58.064                           | C <sub>2</sub> H <sub>4</sub> NO <sup>+</sup>                              |                     |               |           |
|               |     |          |            |           |                                                               | 60.081                           | C <sub>3</sub> H <sub>8</sub> O <sup>+</sup>                               |                     |               |           |
|               |     |          |            |           |                                                               | 71.085                           | C <sub>5</sub> H <sub>11</sub> <sup>+</sup>                                |                     |               |           |

|          |    |        |          |       |                                                                |         |                                                                             |                                                                                 |               |         |
|----------|----|--------|----------|-------|----------------------------------------------------------------|---------|-----------------------------------------------------------------------------|---------------------------------------------------------------------------------|---------------|---------|
|          | 13 | 20.834 | 512.4256 | 0.08  | C <sub>22</sub> H <sub>49</sub> N <sub>13</sub> O              | 102.091 | C <sub>4</sub> H <sub>12</sub> N <sub>3</sub> <sup>+</sup>                  | cabanillasin                                                                    | antibacterial | [17]    |
|          |    |        |          |       |                                                                | 256.200 | C <sub>11</sub> H <sub>26</sub> N <sub>7</sub> <sup>+</sup>                 |                                                                                 |               |         |
|          |    |        |          |       |                                                                | 257.154 | C <sub>11</sub> H <sub>25</sub> N <sub>6</sub> O <sup>+</sup>               |                                                                                 |               |         |
|          |    |        |          |       |                                                                | 283.263 | C <sub>13</sub> H <sub>29</sub> N <sub>7</sub> <sup>+</sup>                 |                                                                                 |               |         |
|          | 14 | 21.354 | 540.4986 | 0.037 | C <sub>33</sub> H <sub>65</sub> NO                             | 102.091 | C <sub>4</sub> H <sub>8</sub> NO <sub>2</sub> <sup>+</sup>                  | suillumide                                                                      | cytotoxic     | [18]    |
|          |    |        |          |       |                                                                | 256.263 | C <sub>16</sub> H <sub>32</sub> O <sub>2</sub> <sup>+</sup>                 |                                                                                 |               |         |
|          |    |        |          |       |                                                                | 257.266 | C <sub>16</sub> H <sub>33</sub> O <sub>2</sub> <sup>+</sup>                 |                                                                                 |               |         |
|          |    |        |          |       |                                                                | 311.295 | C <sub>19</sub> H <sub>37</sub> NO <sub>2</sub> <sup>+</sup>                |                                                                                 |               |         |
|          | 15 | 9.768  | 563.2764 | 0.007 | C <sub>21</sub> H <sub>38</sub> N <sub>8</sub> O <sub>10</sub> | 312.235 | C <sub>18</sub> H <sub>34</sub> NO <sub>3</sub> <sup>+</sup>                | (+) -(2S,3S,4R)-10-De-O-carbamoyl-12-O-carbamoyl-Nβ-acetylstreptothricin F acid | -             | [19]    |
|          |    |        |          |       |                                                                | 147.117 | C <sub>5</sub> H <sub>11</sub> N <sub>2</sub> O <sub>3</sub> <sup>+</sup>   |                                                                                 |               |         |
|          |    |        |          |       |                                                                | 216.109 | C <sub>7</sub> H <sub>12</sub> N <sub>4</sub> O <sub>4</sub> <sup>+</sup>   |                                                                                 |               |         |
|          |    |        |          |       |                                                                | 435.252 | C <sub>15</sub> H <sub>27</sub> N <sub>6</sub> O <sub>9</sub> <sup>+</sup>  |                                                                                 |               |         |
| P-WZ-5-3 | 16 | 13.526 | 373.1646 | 0.002 | C <sub>21</sub> H <sub>24</sub> O <sub>6</sub>                 | 445.233 | C <sub>17</sub> H <sub>31</sub> N <sub>7</sub> O <sub>7</sub> <sup>+</sup>  | penikellides A                                                                  | -             | [20,21] |
|          |    |        |          |       |                                                                | 109.065 | C <sub>7</sub> H <sub>9</sub> O <sup>+</sup>                                |                                                                                 |               |         |
|          |    |        |          |       |                                                                | 123.043 | C <sub>7</sub> H <sub>7</sub> O <sub>2</sub> <sup>+</sup>                   |                                                                                 |               |         |
|          |    |        |          |       |                                                                | 147.075 | C <sub>9</sub> H <sub>7</sub> O <sub>2</sub> <sup>+</sup>                   |                                                                                 |               |         |
|          | 17 | 17.27  | 579.2912 | 0.002 | C <sub>29</sub> H <sub>42</sub> N <sub>2</sub> O <sub>10</sub> | 315.156 | C <sub>17</sub> H <sub>15</sub> O <sub>6</sub> <sup>+</sup>                 | (4R)-4,5-Dihydro-4-hydroxygeldanamyacin                                         | cytotoxic     | [22]    |
|          |    |        |          |       |                                                                | 74.097  | C <sub>3</sub> H <sub>6</sub> O <sub>2</sub> <sup>+</sup>                   |                                                                                 |               |         |
|          |    |        |          |       |                                                                | 117.054 | C <sub>4</sub> H <sub>7</sub> NO <sub>3</sub> <sup>+</sup>                  |                                                                                 |               |         |
|          |    |        |          |       |                                                                | 499.195 | C <sub>27</sub> H <sub>35</sub> N <sub>2</sub> O <sub>7</sub> <sup>+</sup>  |                                                                                 |               |         |
|          | 18 | 17.714 | 743.4338 | 0.015 | C <sub>38</sub> H <sub>58</sub> N <sub>6</sub> O <sub>9</sub>  | 577.284 | C <sub>29</sub> H <sub>41</sub> N <sub>2</sub> O <sub>10</sub> <sup>+</sup> | brintonamide B                                                                  | -             | [23]    |
|          |    |        |          |       |                                                                | 382.241 | C <sub>19</sub> H <sub>33</sub> N <sub>3</sub> O <sub>5</sub> <sup>+</sup>  |                                                                                 |               |         |
|          |    |        |          |       |                                                                | 389.156 | C <sub>20</sub> H <sub>27</sub> N <sub>3</sub> O <sub>5</sub> <sup>+</sup>  |                                                                                 |               |         |
|          |    |        |          |       |                                                                | 360.136 | C <sub>19</sub> H <sub>26</sub> N <sub>3</sub> O <sub>4</sub> <sup>+</sup>  |                                                                                 |               |         |
| P-56-2   | 19 | 10.915 | 334.2741 | 0.000 | C <sub>21</sub> H <sub>35</sub> NO <sub>2</sub>                | 91.054  | C <sub>7</sub> H <sub>7</sub> <sup>+</sup>                                  | preussin I                                                                      | -             | [24]    |
|          |    |        |          |       |                                                                | 228.231 | C <sub>13</sub> H <sub>26</sub> NO <sub>2</sub> <sup>+</sup>                |                                                                                 |               |         |
|          |    |        |          |       |                                                                | 242.212 | C <sub>14</sub> H <sub>28</sub> NO <sub>2</sub> <sup>+</sup>                |                                                                                 |               |         |
|          |    |        |          |       |                                                                | 272.258 | C <sub>19</sub> H <sub>30</sub> N <sup>+</sup>                              |                                                                                 |               |         |
|          | 20 | 17.175 | 279.1590 | 0.002 | C <sub>16</sub> H <sub>22</sub> O <sub>4</sub>                 | 57.070  | C <sub>3</sub> H <sub>5</sub> O <sup>+</sup>                                | cytosporone C                                                                   | cytotoxic     | [25,26] |
|          |    |        |          |       |                                                                | 149.023 | C <sub>8</sub> H <sub>5</sub> O <sub>3</sub> <sup>+</sup>                   |                                                                                 |               |         |
|          |    |        |          |       |                                                                | 150.027 | C <sub>8</sub> H <sub>6</sub> O <sub>3</sub> <sup>+</sup>                   |                                                                                 |               |         |
|          |    |        |          |       |                                                                | 88.075  | C <sub>4</sub> H <sub>8</sub> O <sub>2</sub> <sup>+</sup>                   |                                                                                 |               |         |
|          | 21 | 10.578 | 246.1700 | 0.073 | C <sub>12</sub> H <sub>23</sub> NO <sub>4</sub>                | 102.091 | C <sub>5</sub> H <sub>10</sub> O <sub>2</sub> <sup>+</sup>                  | 3-hydroxy-N-(1-hydroxy-3-methylpentan-2-yl)-5-oxohexanamide                     | -             | [27]    |
|          |    |        |          |       |                                                                | 202.215 | C <sub>9</sub> H <sub>16</sub> NO <sub>4</sub> <sup>+</sup>                 |                                                                                 |               |         |
|          |    |        |          |       |                                                                | 229.235 | C <sub>11</sub> H <sub>19</sub> NO <sub>4</sub> <sup>+</sup>                |                                                                                 |               |         |
|          |    |        |          |       |                                                                | 113.093 | C <sub>7</sub> H <sub>13</sub> O <sup>+</sup>                               |                                                                                 |               |         |
| P-341-2  | 22 | 16.821 | 335.2217 | 0.002 | C <sub>20</sub> H <sub>30</sub> O <sub>4</sub>                 | 195.10  | C <sub>11</sub> H <sub>15</sub> O <sub>3</sub> <sup>+</sup>                 | eutypellone A                                                                   | -             | [28]    |
|          |    |        |          |       |                                                                | 251.094 | C <sub>15</sub> H <sub>23</sub> O <sub>3</sub> <sup>+</sup>                 |                                                                                 |               |         |
|          |    |        |          |       |                                                                | 308.200 | C <sub>18</sub> H <sub>28</sub> O <sub>4</sub> <sup>+</sup>                 |                                                                                 |               |         |
|          |    |        |          |       |                                                                | 129.018 | C <sub>5</sub> H <sub>5</sub> O <sub>4</sub> <sup>+</sup>                   |                                                                                 |               |         |
|          | 23 | 17.27  | 361.2221 | 0.001 | C <sub>18</sub> H <sub>32</sub> O <sub>7</sub>                 | 207.062 | C <sub>7</sub> H <sub>11</sub> O <sub>7</sub> <sup>+</sup>                  | CJ-13, 982                                                                      | -             | [29]    |
|          |    |        |          |       |                                                                | 211.061 | C <sub>13</sub> H <sub>23</sub> O <sub>2</sub> <sup>+</sup>                 |                                                                                 |               |         |
|          |    |        |          |       |                                                                | 268.123 | C <sub>14</sub> H <sub>20</sub> O <sub>5</sub> <sup>+</sup>                 |                                                                                 |               |         |
|          |    |        |          |       |                                                                |         |                                                                             |                                                                                 |               |         |

## References

1. Son, S.; Ko, S.K.; Kim, S.M.; Kim, E.; Kim, G.S.; Lee, B. Antibacterial cyclic lipopeptide enamidonins with an amide-linked acyl chain from a *Streptomyces* species. *J. Nat. Prod.* 2018, 81, 2462-2469.
2. Tsukamoto, S.; Kato, H.; Samizo, M.; Nojiri, Y. Notoamides F-K, prenylated indole alkaloids isolated from a marine-derived *Aspergillus* sp. *J. Nat. Prod.* 2008, 71, 2064-2067.
3. Wang, F.; Sarotti, A.M.; Jiang, G.; Huguet-Tapia, J.C.; Zheng, S.L. Waikikiamides A-C: complex diketopiperazine dimer and diketopiperazine-polyketide hybrids from a Hawaiian marine fungal strain *Aspergillus* sp. FM242. *Org. Lett.* 2020, 22, 4408-4412.
4. Xie, C. L.; Zhang, D.; Xia, J.M.; Hu, C.C.; Lin, T. Steroids from the deep-sea-derived fungus *Penicillium granulatum* MCCC 3A00475 induced apoptosis via Retinoid X Receptor (RXR)- $\alpha$  pathway. *Mar. Drugs.* 2019, 17, 178.
5. Lee, I.K.; Jang, Y.W.; Yu, S.H.; Yun, B.S. New triterpene glucosides, oligoporins A-C, from *Oligoporus tephroleucus* protect DNA from Fenton reaction. *Bioorg. Med. Chem. Lett.* 2007, 17, 4906-4909.
6. Wenzel, S.C.; Müller, R. Myxobacterial natural product assembly lines: fascinating examples of curious biochemistry. *Nat Prod Rep.* 2007, 24, 1211-24.
7. Perlova, O.; Gerth, K.; Kaiser, O.; Hans, A.; Müller, R. Identification and analysis of the chivosazol biosynthetic gene cluster from the myxobacterial model strain *Sorangium cellulosum* So ce56. *J. Biotechnol.* 2006, 121, 174-191.
8. Guo, Y.W.; Gong, B.Q.; Yuan, J.; Li, H.J. l-Phenylalanine alters the privileged secondary metabolite production in the marine-derived fungus *Trichoderma erinaceum* F1-1. *J. Nat. Prod.* 2020, 83, 79-87.
9. Mitova, M.I.; Lang, G.; Blunt, J.W.; Cummings, N.J. Cladobotric acids A-F: new cytotoxic polyketides from a new zealand *Cladobotryum* sp. *J. Org. Chem.* 2006, 71, 492-497.
10. Akira, M.; Kosei, H.; Saburo, T. Fragin, a New Biologically Active Metabolite of a *Pseudomonas*. *Agricultural and biological chemistry.* 1969, 33, 1599-1605.
11. Tamura, S.; Murayama, A.; Hata, K. Isolation and structural elucidation of fragin, a new plant growth inhibitor produced by a *Pseudomonas*. *Agricultural and Biological Chemistry.* 1967, 31, 758-759.
12. Nagahara, Y.; Shinomiya, T.; Kuroda, S.; Kaneko, N. Phytosphingosine induced mitochondria-involved apoptosis. *Cancer Sci.* 2005, 96, 83-92.
13. Glenz, R.; Kaiping, A.; Göpfert, D.; Weber, H. The major plant sphingolipid long chain base phytosphingosine inhibits growth of bacterial and fungal plant pathogens. *Sci. Rep.* 2022, 12, 1081.
14. Weber, S.S.; de Souza, A.C.S.; Soares, D.C.L. Chemical profile, antimicrobial potential, and antiaggregant activity of supercritical fluid extract from *Agaricus bisporus*. *Chem. Pap.* 2022, 76, 6205-6214.
15. De Medeiros, L.S.; Abreu, L.M.; Nielsen, A.; Ingmer, H. Dereplication-guided isolation of depsides thielavins S-T and lecanorins D-F from the endophytic fungus *Setophoma* sp. *Phytochemistry.* 2015, 11, 1154-162.
16. Chen, L.; Zhang, Q.Q.; Hu, X. Novel cytotoxic metabolites from the marine-derived fungus *Trichoderma citrinoviride*. *Heterocycles.* 2014, 89, 189.
17. Houard, J.; Aumelas, A.; Noël, T.; Pages, S.; Givaudan, A. Cabanillasin, a new antifungal metabolite, produced by entomopathogenic *Xenorhabdus cabanillasii* JM26. *J. Antibiot. (Tokyo).* 2013, 66, 617-620.
18. León, F.; Brouard, I.; Torres, F.; Quintana, J. A new ceramide from *suillus luteus* and its cytotoxic activity against human melanoma cells. *Chem. Biodivers.* 2008, 5, 120-125.
19. Gan, M.; Zheng, X.; Gan, L.; Guan, Y.; Hao, X. Streptothricin derivatives from *Streptomyces* sp. I08A 1776. *J. Nat. Prod.* 2011, 74, 1142-1147.
20. Luo, H.; Li, X.M.; Li, C.S. Diphenyl ether and benzophenone derivatives from the marine mangrove-derived fungus *Penicillium* sp. MA-37. *Phytochemistry Lett.* 2014, 9, 22-25.
21. Zhang, F.; Gang, D.; Li, L. Isolation, antimicrobial activity, and absolute configuration of the furylidene tetronic acid core of pestalotic acids A-G. *Org. Biomol. Chem.* 2012, 10, 5307.
22. Li, T.; Ni, S.; Jia, C.; Wang, H.; Sun, G.; Wu, L.; Gan, M. Identification of 4,5-dihydro-4-hydroxygeldanamycins as shunt products of geldanamycin biosynthesis. *J. Nat. Prod.* 2012, 75, 1480-1484.
23. Al-Awadhi, F.H.; Gao, B.; Rezaei, M.A.; Kwan, J.C.; Li, C. Discovery, synthesis, pharmacological profiling, and biological characterization of brintonamides A-E, novel dual protease and GPCR modulators from a marine *Cyanobacterium*. *J. Med. Chem.* 2018, 61, 6364-6378.
24. Gu, B.B.; Jiao, F.R.; Wu, W.; Jiao, W.H.; Li, L.; Sun, F. Preussins with Inhibition of IL-6 expression from *Aspergillus flocculosus* 16D-1, a fungus isolated from the marine sponge *phakellia fusca*. *J. Nat. Prod.* 2018, 81, 2275-2281.
25. Liu, H.X.; Li, H.H.; Chen, Y.C. Cytotoxic secondary metabolites from an endophytic fungal strain of *phomopsis phyllanthicola*. *Chinese J. Org. Chem.* 2019, 39, 1475.

26. Lena, H.; Debbab, A.; Ngoc, T.D. Polyketides from the mangrove-derived endophytic fungus *Acremonium strictum*. *Tetrahedron Lett.* 2014, 55, 3463-3468.
27. Xiao, J.; Zhang, Q.; Gao, Y.Q. Secondary metabolites from the endophytic *Botryosphaeria dothidea* of *Melia azedarach* and their antifungal, antibacterial, antioxidant, and cytotoxic activities. *J. Agric. Food Chem.* 2014, 62, 3584-3590.
28. Isaka, M.; Palasarn, S.; Prathumpai, W.; Laksanacharoen, P. Pimarane diterpenes from the endophytic fungus *Eutypella* sp. BCC 13199. *Chem. Pharm. Bull.* 2011, 59, 1157-1159.
29. Watanabe, S.; Hirai, H.; Kambara, T.; Kojima, Y.; Nishida, H.; Sugiura, A. CJ-13,981 and CJ-13,982, new squalene synthase inhibitors. *J. Antibiot. (Tokyo)*. 2001, 54, 1025-1030.

## Supplementary Figures. Possible fragmentation pathways of compounds 1-23.

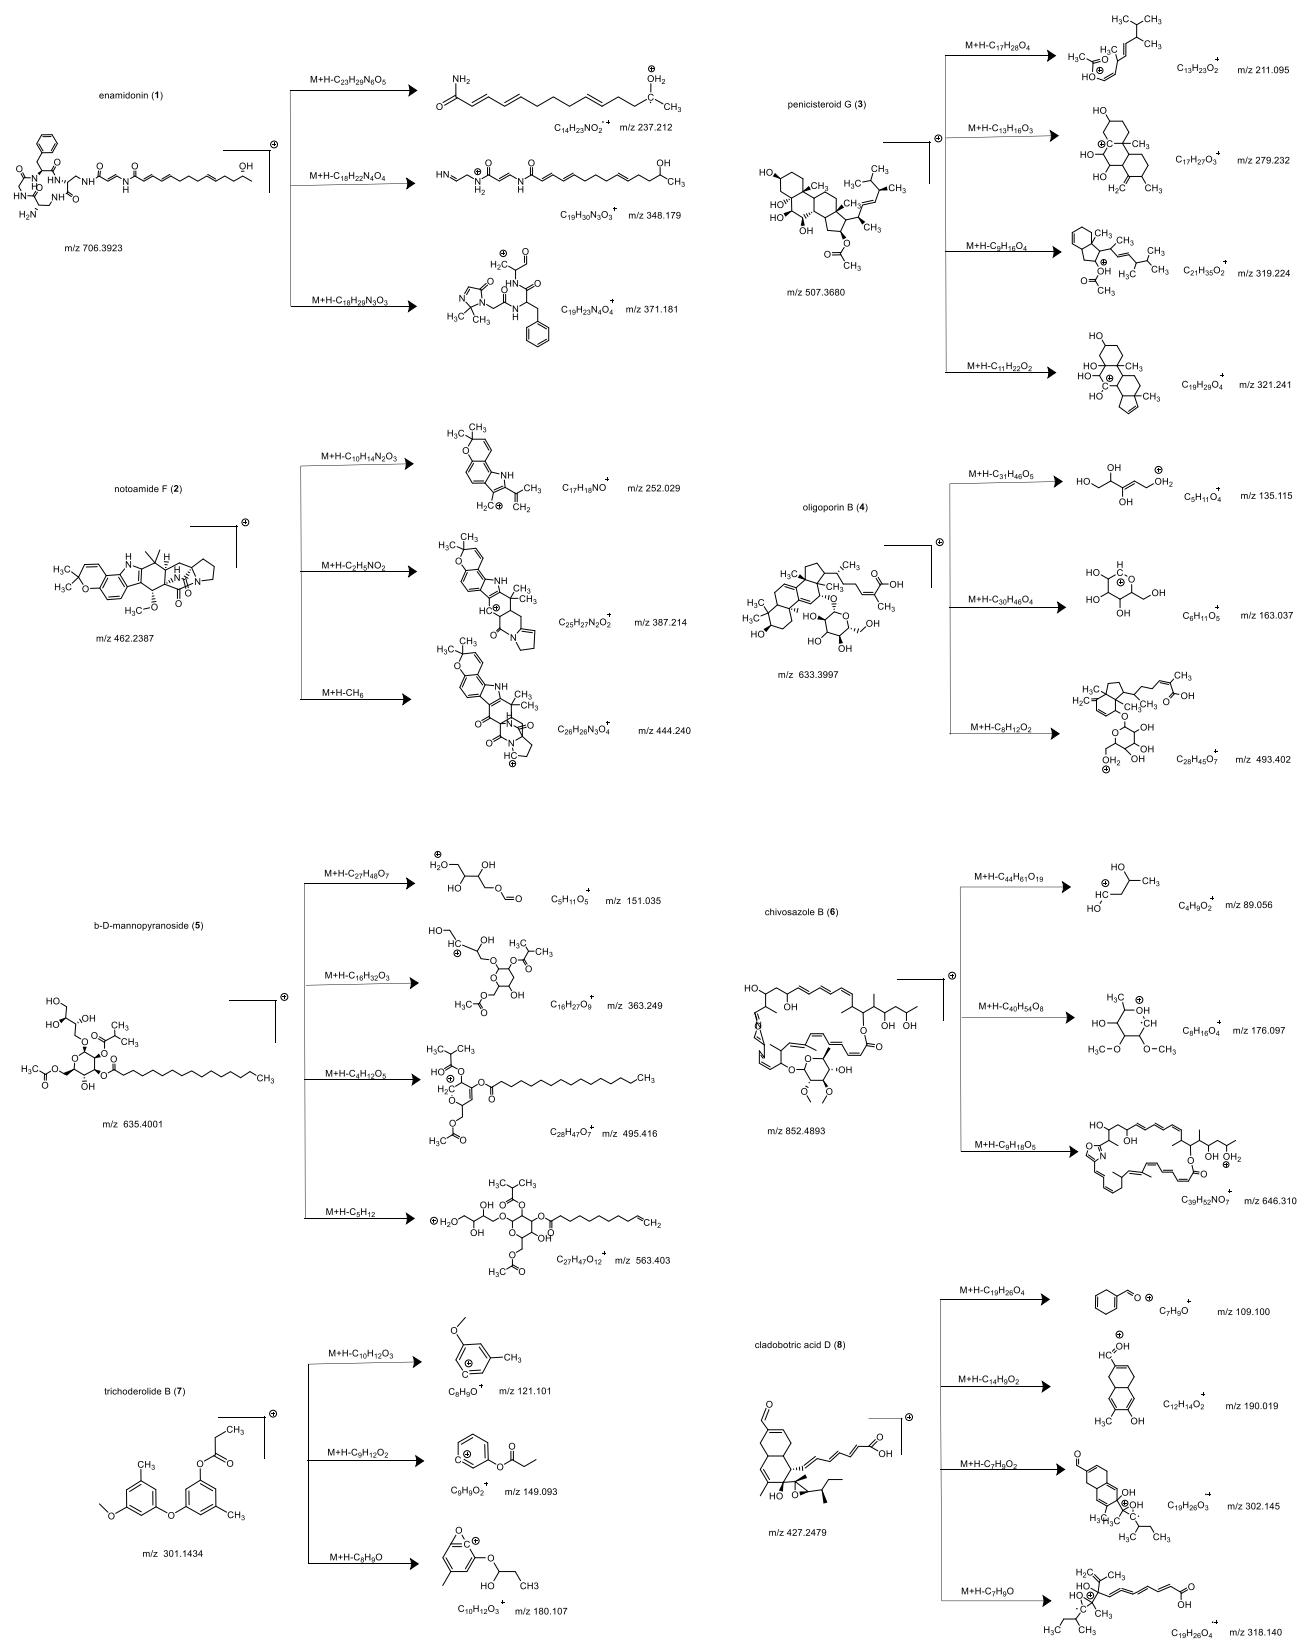

Figure S1. Possible fragmentation pathways of the structure of compounds 1-8.

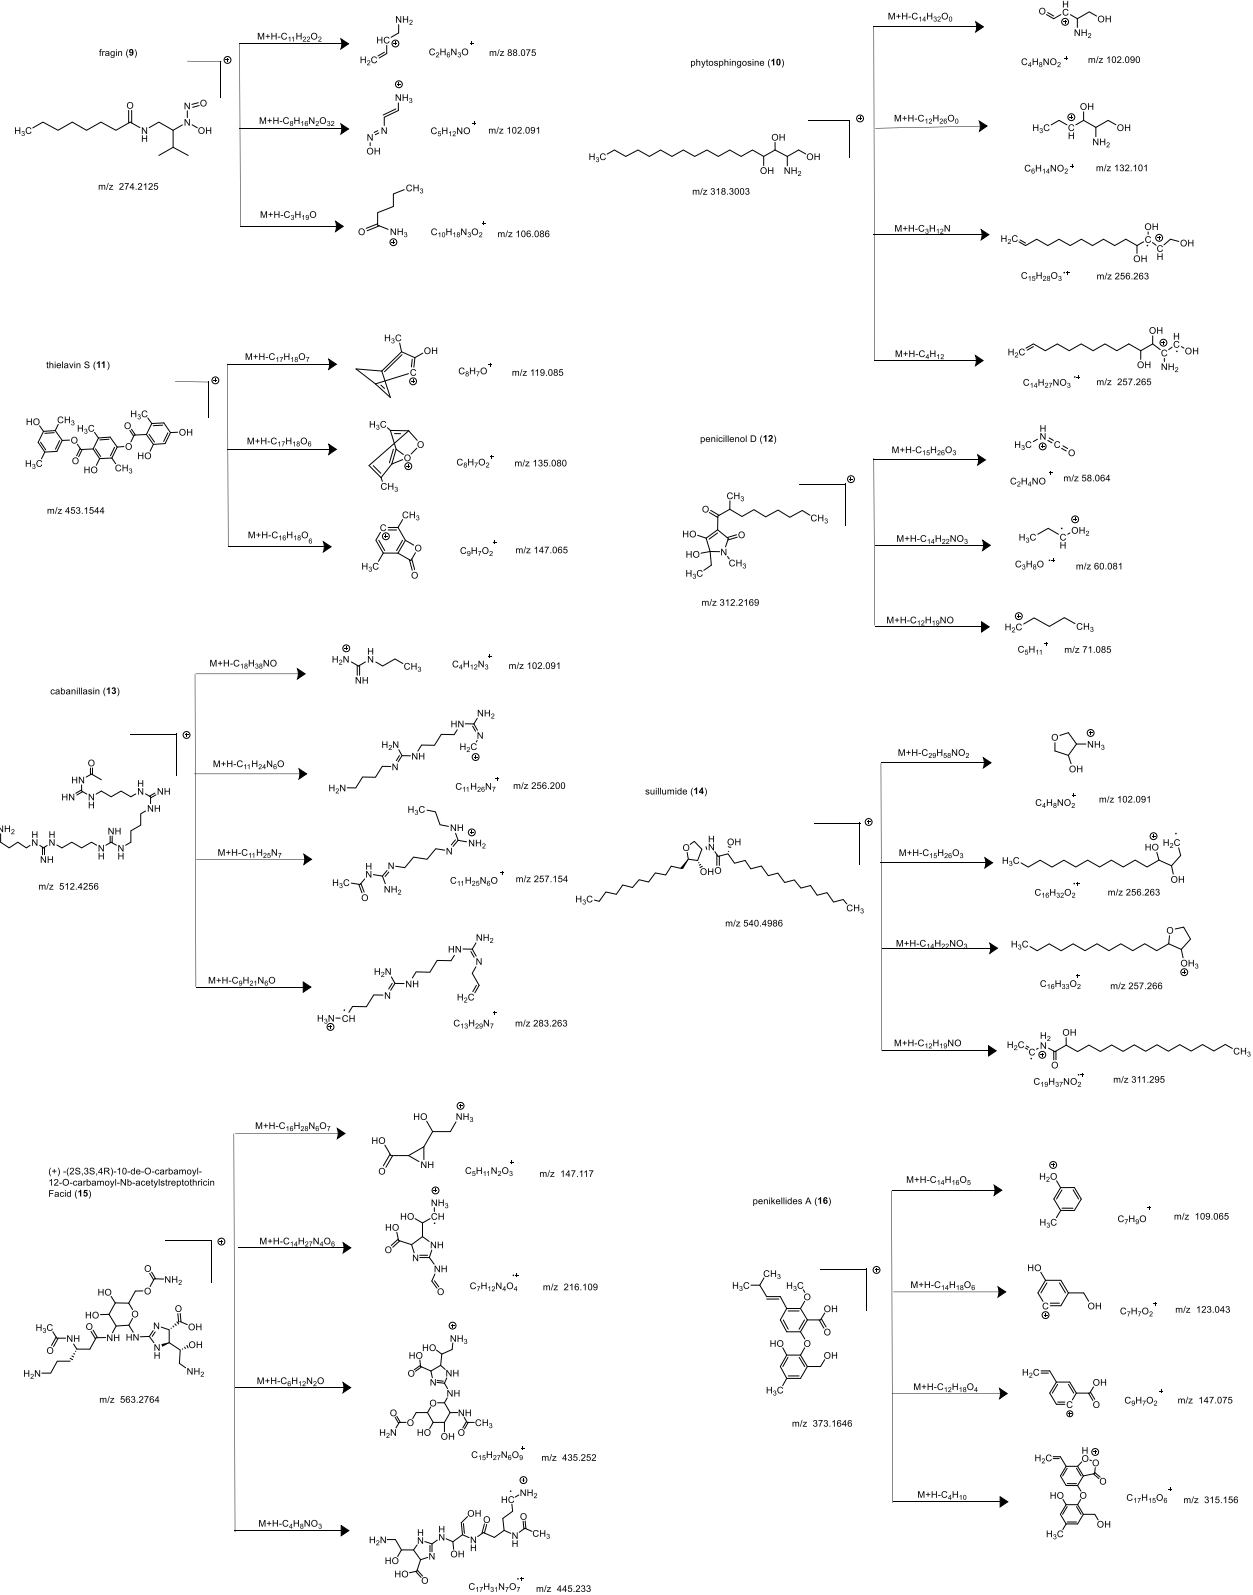

**Figure S2.** Possible fragmentation pathways of the structure of compounds 9-16.



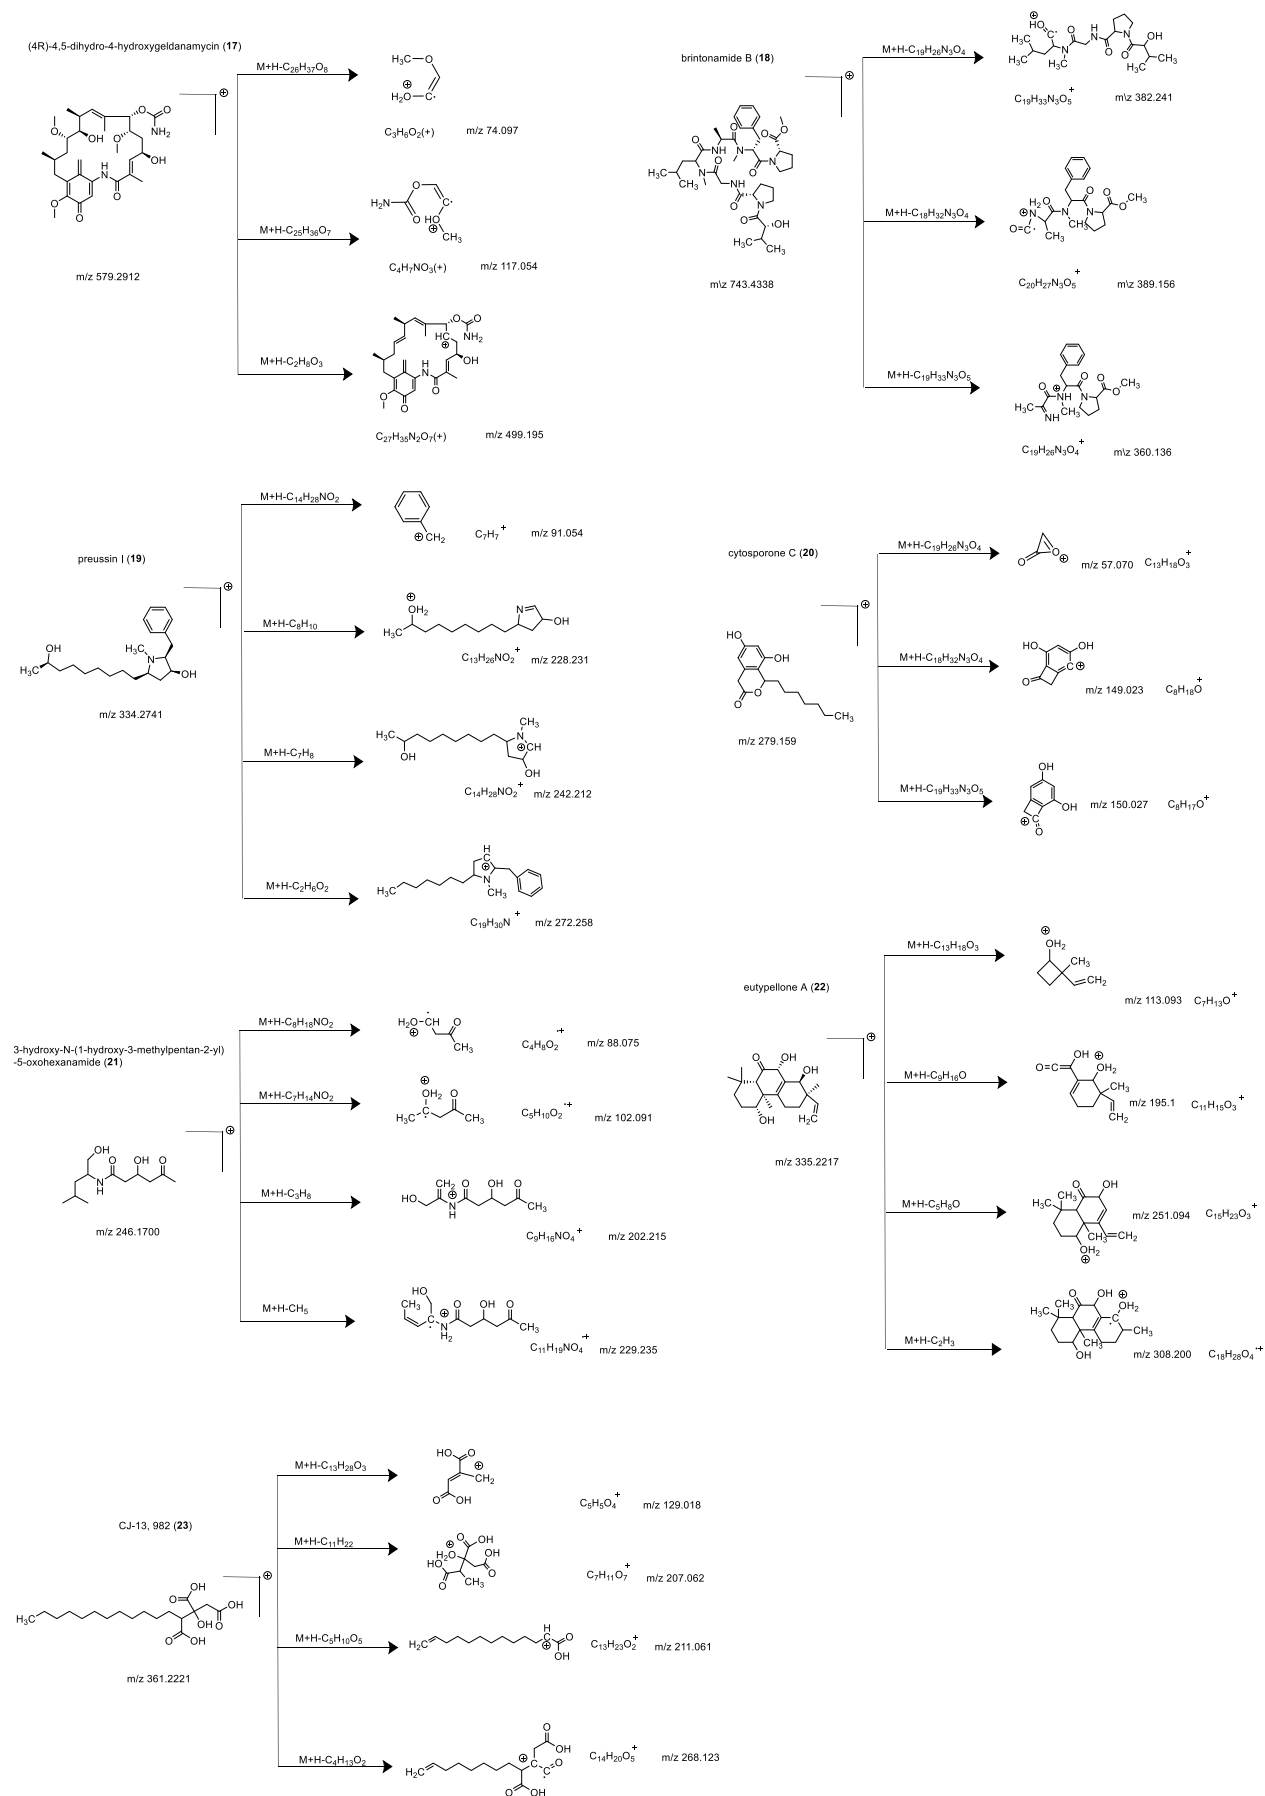

**Figure S3.** Possible fragmentation pathways of the structure of compounds **17-23**.
